# Supplementary material
Source: ML conference proceedings conference paper supplement (https://proceedings.neurips.cc/paper_files/paper/2018/hash/fc325d4b598aaede18b53dca4ecfcb9c-Abstract.html)
Supplement: Supplementary file [file fc325d4b598aaede18b53dca4ecfcb9c-Supplemental.zip]

## Appendix

### A Proof of Lemma 2.10

Suppose that  $d_{TV}(p, \mathcal{C}_U) \geq \epsilon$ . We want to show that with high probability over the samples it holds  $\sum_{i \in S} |p_i - p(S)/|S|| = \Omega(\epsilon)$ . The main difficulty is that the value of  $p(S)$  is unknown, hence we need a somewhat indirect argument. By Claim 2.6, for all  $x \in [0, 1]$  we have that

$$\sum_{i \in \Omega} \min\{p_i, |p_i - x|\} \geq \epsilon/2. \quad (3)$$

To show that  $Z(x) \stackrel{\text{def}}{=} \sum_{i \in S} |p_i - x| = \Omega(\epsilon)$ , when  $x = p(S)/|S|$ . To do this, we note that for any  $S$ ,  $Z(x)$  always attains a minimum at  $p_i$  for some  $i$ . Furthermore, if  $|S| = \Theta(n)$  and  $p(S) \geq 1/3$ , then  $Z(x)$  is automatically large unless  $x = \Theta(1/n)$ . Thus, it suffices to show that:

**Claim A.1.** *With probability at least  $19/20$ , for all  $x = p_i = \Theta(1/n)$ , we have that  $Z(x) = \Omega(\epsilon)$ .*

*Proof.* We note that there are only  $O(n)$  allowable values of  $x$ , and so we will prove that for any given  $x = \Theta(1/n)$  that the statement holds with high probability.

Let  $Z_i$ ,  $i \in \Omega$ , be the indicator of the event  $i \in S$ . Then,  $Z(x) = \sum_{i \in \Omega} |p_i - x| Z_i$ . Note that  $Z_i$  is a Bernoulli random variable with  $\mathbf{E}[Z_i] = 1 - e^{-p_i m}$  and that the  $Z_i$ 's are mutually independent. Note that  $\mathbf{E}[Z(x)] = \sum_{i \in \Omega} (1 - e^{-p_i m}) |p_i - x|$ . We recall the following concentration inequality for sums of non-negative random variables (see, e.g., Exercise 2.9 in [BLM13]):

**Fact A.2.** *Let  $X_1, \dots, X_k$  be independent non-negative random variables, and  $X = \sum_{j=1}^k X_j$ . Then, for any  $t > 0$ , it holds that  $\Pr[X \leq \mathbf{E}[X] - t] \leq \exp\left(-t^2 / (2 \sum_{i=1}^k \mathbf{E}[X_i^2])\right)$ .*

Since  $Z(x) = \sum_{i \in \Omega} |p_i - x| Z_i$  where the  $Z_i$ 's are independent Bernoulli random variables with  $\mathbf{E}[Z_i^2] = 1 - e^{-p_i m}$ , an application of Fact A.2 yields that

$$\Pr[Z(x) \leq \mathbf{E}[Z(x)] - t] \leq \exp\left(\frac{-t^2}{2 \sum_{i \in \Omega} (1 - e^{-p_i m}) (p_i - x)^2}\right). \quad (4)$$

Let  $S_l = \{i \in \Omega : p_i \leq x/2\}$  and  $S_h = \Omega \setminus S_l$ . By (3), we get that  $\sum_{i \in S_l} p_i + \sum_{i \in S_h} |x - p_i| \geq \epsilon/2$ . For  $i \in S_l$ , we have that  $(1 - e^{-p_i m}) |p_i - x| \geq m \cdot p_i \cdot |x/2| = \Omega(p_i)$ . For  $i \in S_h$ , we have that  $(1 - e^{-p_i m}) = \Omega(1)$  and therefore  $(1 - e^{-p_i m}) |p_i - x| = \Omega(1) |p_i - x|$ . We therefore get that  $\mathbf{E}[Z(x)] = \Omega(\epsilon)$ . We now bound  $\sum_{i \in \Omega} (1 - e^{-p_i m}) (p_i - x)^2$  from above using the fact that  $p_i = O(\log n/n)$ , for all  $i \in \Omega$ . This assumption and the range of  $x$  imply that

$$\sum_{i \in \Omega} (1 - e^{-p_i m}) (p_i - x)^2 \leq O(\log n/n) \cdot \mathbf{E}[Z].$$

So, by setting  $t = \mathbf{E}[Z]/2$  in (4), we get that

$$\Pr[Z(x) \leq \mathbf{E}[Z(x)]/2] \leq \exp(-\Omega(\epsilon n / \log n)) = \exp(-n^{\Omega(1)}),$$

where the last inequality follows from the range of  $\epsilon$ . Recalling that there are only  $O(1/n)$  many allowable values of  $x$ , Claim A.1 follows by a union bound.  $\square$

Lemma 2.10 follows from noting that it suffices to show that  $Z(p(S)/|S|) = \Omega(\epsilon)$  when  $|S| = \Theta(n)$  and  $p(S) \geq 1/3$ . In such a case,  $Z(x)$  takes a minimum when  $x = p_i$  for some  $i$ . If  $x = \Theta(1/n)$ , the result follows from our claim. Otherwise, it is easy to see that  $Z(x) = \Omega(1)$  for all  $x$  not  $\Theta(1/n)$ . This completes the proof of our lemma.  $\square$

To complete our analysis of the soundness case, we have that unless  $p$  assigns some bin probability  $\Omega(\log(n)/n)$ , that with high probability over samples, either we are rejected by (ii), have  $p(S) < 1/3$  or  $(p|S)$  is  $\Omega(\epsilon)$ -far from uniform. If  $p(S) \leq 1/3$ , most of our  $m'$  samples lie outside of  $S$  with high probability. If  $(p|S)$  is far from uniform, our  $m'$  samples from Step 6 either mostly lie outside of  $S$  (in which case we reject), or the first  $m'/2$  of them are independent random samples from  $(p|S)$ . Since  $(p|S)$  is  $\epsilon/C'$ -far from uniform, our uniformity tester will reject with 99% probability. This completes our proof.

## B Omitted Proofs from Section 3

We exhibit the relevant families  $\mathcal{D}$  and  $\mathcal{D}'$ . In both cases, we want to arrange  $\mu_i := \mu(\{i\})$  to be i.i.d. for different  $i$ . We also want it to be the case that the first and second moments of  $\mu_i$  are the same for  $\mathcal{D}$  and  $\mathcal{D}'$ . Combining this with requirements on closeness to uniform, we are led to the following definitions:

For  $\mu$  taken from  $\mathcal{D}'$ , we let

$$\mu_i = \begin{cases} \frac{1+\epsilon}{n} & , \text{ with probability } \frac{n}{2N} \\ \frac{1-\epsilon}{n} & , \text{ with probability } \frac{n}{2N} \\ 0 & , \text{ otherwise .} \end{cases}$$

For  $\mu$  taken from  $\mathcal{D}$ , we let

$$\mu_i = \begin{cases} \frac{1+\epsilon^2}{n} & , \text{ with probability } \frac{n}{N(1+\epsilon^2)} \\ 0 & , \text{ otherwise .} \end{cases}$$

Note that in both cases, the average total mass is 1, and it is easy to see by Chernoff bounds that the actual mass of  $\mu$  is  $\Theta(1)$  with high probability. Additionally, in both cases the expected sizes of  $\|p\|_2^2$  and  $\|p\|_3^3$  are  $\Theta(n^{-1})$  and  $\Theta(n^{-2})$ , respectively. Again, it is not hard to show by a Chernoff bound that with high probability the actual second and third moments of  $p$  are within constant factors of this. For  $\mu$  taken from  $\mathcal{D}$ , all of the  $\mu_i$  are either 0 or  $\frac{1+\epsilon^2}{n}$ , and thus  $\mu/\|\mu\|_1$  is uniform over its support. For  $\mu$  taken from  $\mathcal{D}'$ , with high probability at least a third of the bins in its support have  $\mu_i = \frac{1+\epsilon}{n}$ , and at least a third have  $\mu_i = \frac{1-\epsilon}{n}$ . If this is the case, then at least a constant fraction of the mass of  $\mu/\|\mu\|_1$  comes from bins with mass off from the average mass by at least a  $(1 \pm \epsilon)$  factor, and this implies that  $\mu/\|\mu\|_1$  is at least  $\Omega(\epsilon)$ -far from uniform.

We have thus verified 1-4. Property 5 will be somewhat more difficult to prove. For this, let  $X$  be a random  $\{0, 1\}$  random variable with equal probabilities. Let  $\mu$  be chosen randomly from  $\mathcal{D}$  if  $X = 0$ , and randomly from  $\mathcal{D}'$  if  $X = 1$ . Let our Poisson process with intensity  $k\mu$  return  $A_i$  samples from bin  $i$ . We note that, by the same arguments as in [DK16], it suffices to show that the shared information  $I(X; A_1, \dots, A_N) = o(1)$ . In order to prove this, we note that the  $A_i$  are conditionally independent on  $X$ , and thus we have that  $I(X; A_1, \dots, A_N) \leq \sum_{i=1}^N I(X; A_i) = NI(X; A_1)$ . Thus, we need to show that  $I(X; A_1) = o(1/N)$ . For notational simplicity, we drop the subscript in  $A_1$ .

This boils down to an elementary but tedious calculation. We begin by noting that we can bound

$$I(X; A) = \sum_{t=0}^{\infty} O\left(\frac{(\Pr(A=t|X=0) - \Pr(A=t|X=1))^2}{\Pr(A=t)}\right).$$

(This calculation is standard. See Fact 81 in [CDKS17] for a proof.) We seek to bound each of these terms. The distribution of  $A$  conditioned on  $\mu_1$  is Poisson with parameter  $k\mu_1$ . Thus, the distribution of  $A$  conditioned on  $X$  is a mixture of two or three Poisson distributions, one of which is the trivial constant 0. We start by giving explicit expressions for these probabilities.

Firstly, for the  $t = 0$  term, note that

$$\begin{aligned} \Pr(A=t|X=1) &= 1 - \frac{n}{N} \left(1 - \frac{e^{-k(1+\epsilon)/n} + e^{-k(1-\epsilon)/n}}{2}\right), \\ \Pr(A=t|X=0) &= 1 - \frac{n}{N(1+\epsilon^2)}(1 - e^{-k(1+\epsilon^2)/n}). \end{aligned}$$

Note that  $\Pr(A=0)$  is at least  $1 - n/N \geq 1/2$  and  $\Pr(A=t|X=1) - \Pr(A=t|X=0) \leq n/N$ . Thus, the contribution from this term,  $\frac{(\Pr(A=0|X=0) - \Pr(A=0|X=1))^2}{\Pr(A=0)}$ , is  $O(n/N)^2 = o(1/N)$ .

For  $t \geq 1$ , there is no contribution from  $\mu_1 = 0$ . We can compute the probabilities involved exactly as

$$\Pr(A=t|X=1) = \frac{n}{N} \frac{(k(1+\epsilon)/n)^t e^{-k(1+\epsilon)/n} + (k(1-\epsilon)/n)^t e^{-k(1-\epsilon)/n}}{2t!},$$

$$\Pr(A = t | X = 0) = \frac{n}{N(1 + \epsilon^2)} \frac{(k(1 + \epsilon^2)/n)^t e^{-k(1 + \epsilon^2)/n}}{t!},$$

and obtain that  $\frac{(\Pr(A=t|X=0) - \Pr(A=t|X=1))^2}{\Pr(A=t)}$  is

$$O \left( \left( \frac{n^{1-t} k^t}{2Nt!} \right) \frac{\left( (1 + \epsilon)^t e^{-k(1+\epsilon)/n} + (1 - \epsilon)^t e^{-k(1-\epsilon)/n} - 2(1 + \epsilon^2)^{t-1} e^{-k(1+\epsilon^2)/n} \right)^2}{(1 + \epsilon)^t e^{-k(1+\epsilon)/n} + (1 - \epsilon)^t e^{-k(1-\epsilon)/n} + 2(1 + \epsilon^2)^{t-1} e^{-k(1+\epsilon^2)/n}} \right).$$

Factoring out the  $e^{-k/n}$  terms and noting that, since  $k\epsilon/n = o(1)$ , the denominator is  $\Omega(e^{-k/n})$  yields that

$$O \left( \left( \frac{n^{1-t} k^t e^{-k/n}}{2Nt!} \right) \left( (1 + \epsilon)^t e^{-k(1+\epsilon)/n} + (1 - \epsilon)^t e^{-k(1-\epsilon)/n} - 2(1 + \epsilon^2)^{t-1} e^{-k(1+\epsilon^2)/n} \right)^2 \right).$$

Noting that  $k/n = o(1)$ , we can ignore this  $e^{-kn}$  term and Taylor expanding the exponentials, we have that

$$\begin{aligned} & \frac{(\Pr(A = t | X = 0) - \Pr(A = t | X = 1))^2}{\Pr(A = t)} = \\ & O \left( \left( \frac{n^{1-t} k^t}{2Nt!} \right) \left( (1 + \epsilon)^t (1 - k(1 + \epsilon)/n) + (1 - \epsilon)^t (1 + k(1 - \epsilon)/n) \right. \right. \\ & \quad \left. \left. - 2(1 + \epsilon^2)^{t-1} (1 - k(1 + \epsilon^2)/n) + O((k\epsilon/n)^2 (1 + \epsilon)^t) \right)^2 \right). \end{aligned}$$

We deal separately with the cases  $t = 1, t = 2$  and  $t > 2$ . For the  $t = 1$  term, we have

$$\begin{aligned} & O \left( \left( \frac{k}{N} \right) \left( (1 + \epsilon)(1 - k\epsilon/n) + (1 - \epsilon)(1 + k\epsilon/n) - 2(1 - k\epsilon^2/n) + O((k\epsilon/n)^2) \right)^2 \right) \\ & = O \left( \left( \frac{k}{N} \right) O((k\epsilon/n)^2)^2 \right). \end{aligned}$$

Since  $k = o(n^{2/3}/\epsilon^{4/3})$  and  $\epsilon > n^{-1/4}$ ,  $k\epsilon/n = o(n^{-1/3}/\epsilon^{1/3}) = o(n^{-1/4})$ , and we find that this is

$$O \left( \left( \frac{k}{N} \right) o(1/n) \right) = o(1/N).$$

This appropriately bounds the contribution from this term.

When  $t = 2$ , we have

$$\begin{aligned} & O \left( \left( \frac{k^2}{nN} \right) \left( (1 + \epsilon)^2 (1 - k(1 + \epsilon)/n) + (1 - \epsilon)^2 (1 - k(1 - \epsilon)/n) \right. \right. \\ & \quad \left. \left. - 2(1 + \epsilon^2)(1 - k(1 + \epsilon^2)/n) + O((k\epsilon/n)^2) \right)^2 \right). \end{aligned}$$

Note that the terms without  $k/n$  factors cancel out,  $(1 + \epsilon)^2 + (1 - \epsilon)^2 - 2(1 + \epsilon^2) = 0$ , yielding

$$O(k^2/nN)(k\epsilon^2/n + o(n^{-1/2}))^2 = O(k^4\epsilon^4/n^3N) + o(k^2/n^2N) = o(k^3\epsilon^4/n^2N) + o(1/N) = o(1/N),$$

using both  $k = o(n^{2/3}/\epsilon^{4/3})$  and  $k = o(n)$ .

For  $t > 2$ , we let  $f_t(x) = (1 + x)^t (1 - kx/n)$ . In terms of  $f_t$ , we have that  $\frac{(\Pr(A=t|X=0) - \Pr(A=t|X=1))^2}{\Pr(A=t)}$  is:

$$O \left( \left( \frac{n^{1-t} k^t}{2Nt!} \right) (f_t(\epsilon) + f_t(-\epsilon))/2 - f_t(0) - (f_{t-1}(\epsilon^2) - f_{t-1}(0)) + o(n^{-1/2})^2 \right).$$

Using the Taylor expansion of  $f_t$  in terms of its first two derivatives and  $f_{t-1}$  in terms of its first, we see that

$$(f_t(\epsilon) + f_t(-\epsilon))/2 - f_t(0) = \epsilon^2 f_t''(\xi)$$

and

$$f_{t-1}(\epsilon^2) - f_{t-1}(0) = \epsilon^2 f'_{t-1}(\xi'),$$

for some  $\xi \in [-\epsilon, \epsilon]$  and  $\xi' \in [0, \epsilon^2]$ . However, the derivatives are

$$f'_t(x) = (1+x)^{t-1}(t - (1+x+tx)k/n)$$

and

$$f''_t(x) = (1+x)^{t-2}(t(t-1) - t(t+1)xk/n),$$

and so  $|f''_t(\xi)| \leq O(t^2(1+\epsilon)^{t-1})$  and  $f'_{t-1}(\xi') \leq O(t(1+\epsilon^2)^{t-2})$ . Hence, the term

$$\frac{(\Pr(A=t|X=0) - \Pr(A=t|X=1))^2}{\Pr(A=t)}$$

is at most

$$\begin{aligned} & O(n^{1-t}k^t/Nt!)(\epsilon^4 t^4(1+\epsilon)^{2t-2}) + o(1/n) \\ &= O((k^3 \epsilon^4/n^2)(t^4(1+\epsilon)^2/N)(k(1+\epsilon)^2/n)^{t-3}/t!) + o((k/n)^t/(Nt!)) \\ &= o(1/N)t^4/t!, \end{aligned}$$

using both  $k = o(n^{2/3}/\epsilon^{4/3})$  and  $k = o(n)$ . Since  $(t+1)^4/(t+1)! \leq t^4/2t!$  for all  $t \geq 4$ , even summing the above over all  $t \geq 3$  still leaves  $o(1/N)$ .

Thus, we have that  $I(X; A) = o(1/N)$ , and therefore that  $I(X : A_1, \dots, A_N) = o(1)$ . This proves that  $X = 0$  and  $X = 1$  cannot be reliably distinguished given  $A_1, \dots, A_N$ , and thus proves property 5, completing the proof of our lower bound.
